# Supplementary material for: Sleep patterns correlates with the efficacy of tDCS on post-stroke patients with prolonged disorders of consciousness
Source: Springer Nature journal article supplement (doi:10.1186/s12967-022-03710-2), 2022-12-15

Additional file 3: Figure S1

**A**

VS patients with sleep cycles

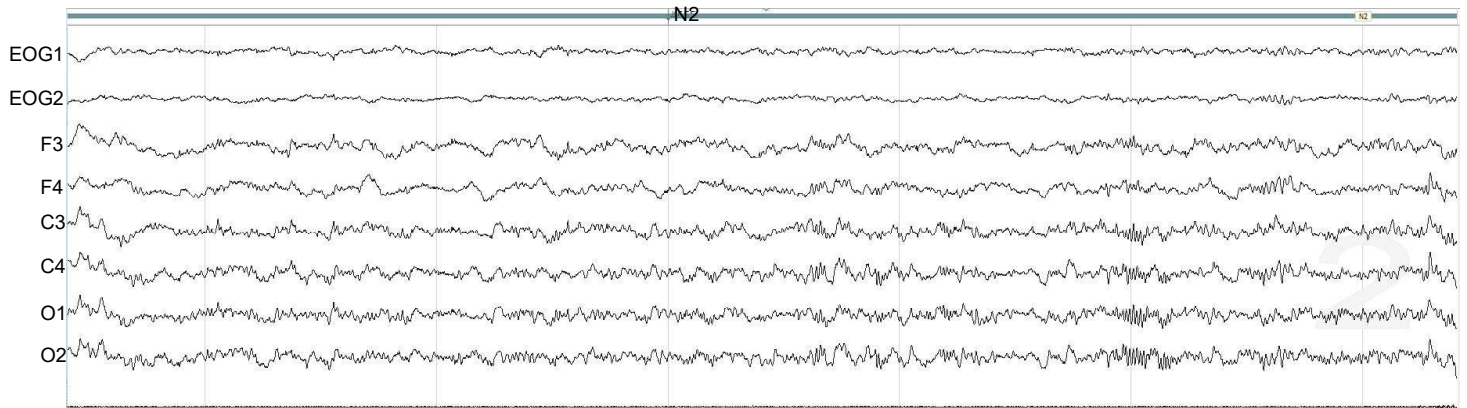

**B**

VS patients without sleep cycles

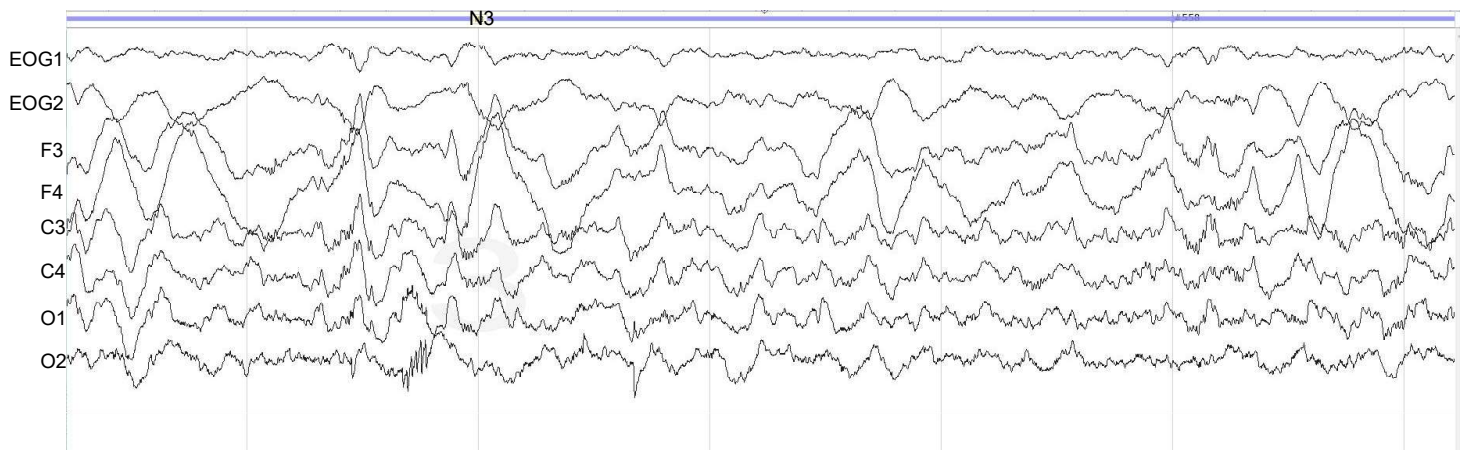

**Additional file 3: Figure S**

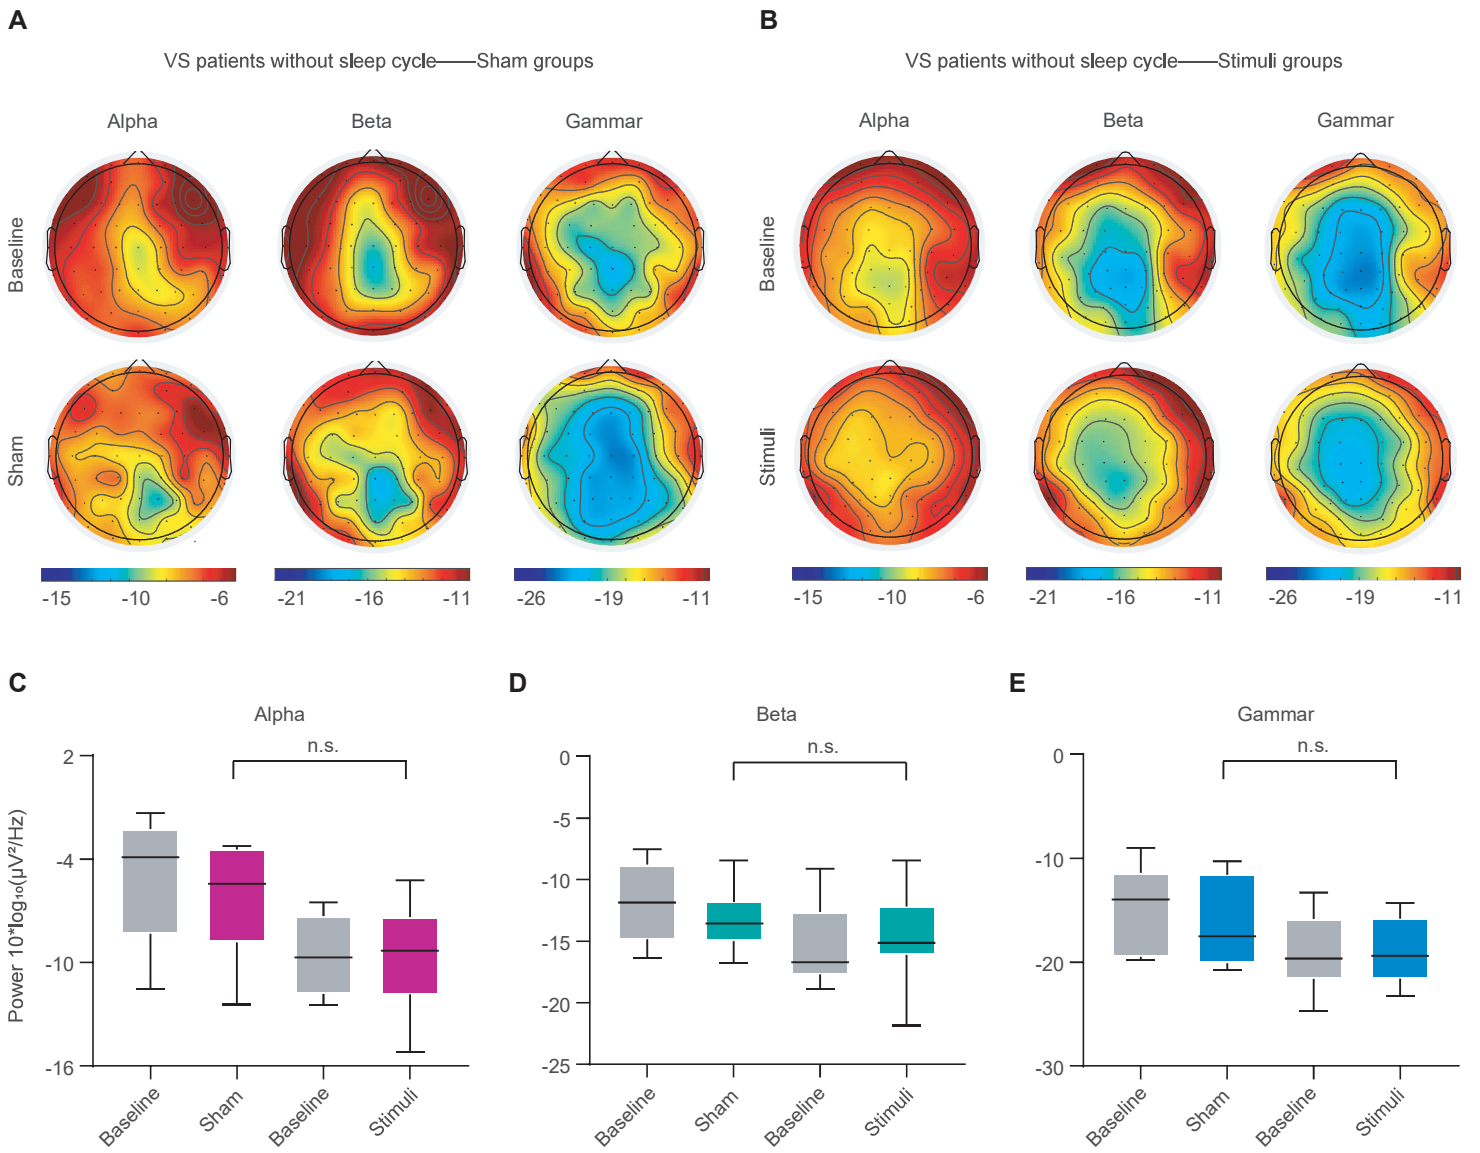

Supplement: MOESM3 [file 23830986]
